# Supplementary material for: Tailoring capacitance of 3D-printed graphene electrodes by carbonisation temperature
Source: Royal Society of Chemistry journal article supplement (doi:10.1039/d0nr04864j), 2020-01-01
Supplement: d0nr04864j1.pdf [file d0nr04864j1.pdf]

Supplementary Information for

## **Tailoring Capacitance of 3D-Printed Graphene Electrodes by Carbonisation Temperature**

Edurne Redondo,<sup>a</sup> Siowwoon Ng,<sup>a</sup> Jose Muñoz,<sup>a</sup> and Martin Pumera<sup>a,b,c,d\*</sup>

*a. Future Energy and Innovation Laboratory, Central European Institute of Technology, Brno University of Technology, Purkynova 123, Brno 61200, Brno CZ-616 00, Czech Republic*

*b. Center for Advanced Functional Nanorobots, Department of Inorganic Chemistry, Faculty of Chemical Technology, University of Chemistry and Technology Prague, Technicka 5, Prague 16628, Czech Republic*

*c. Department of Chemical and Biomolecular Engineering, Yonsei University, 50 Yonsei-ro, Seodaemun-gu, Seoul 03722, South Korea*

*d. Department of Medical Research, China Medical University Hospital, China Medical University, No. 91 Hsueh-Shih Road, Taichung 40402, Taiwan*

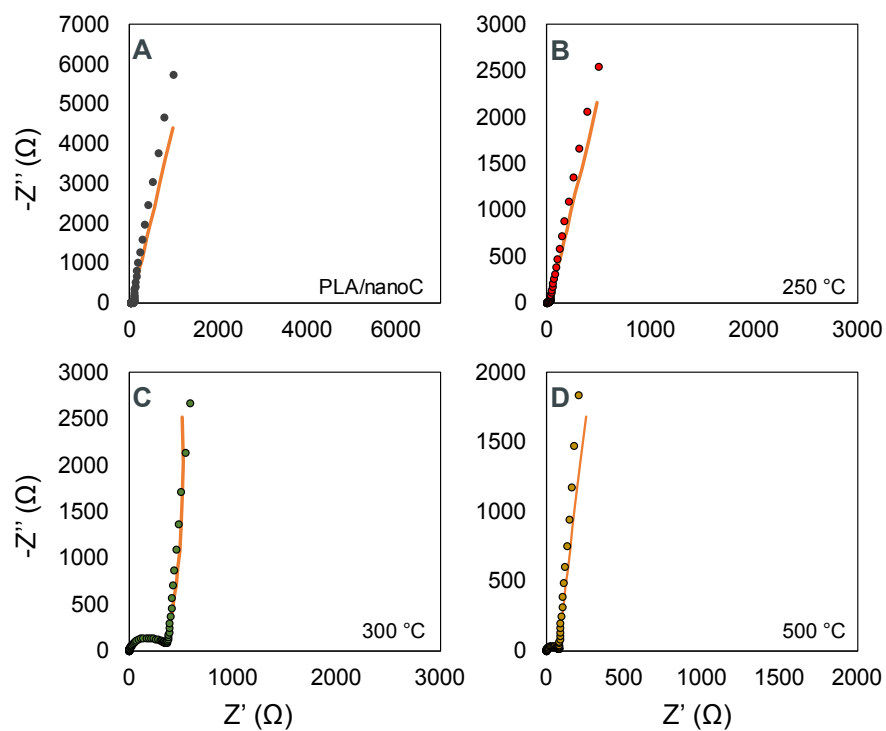

**Figure S1** Nyquist plots of the 3D printed electrodes as printed and after carbonisation at different temperatures, (dotted line) experimental data and (orange line) fitted data. Conditions: bias potential: 0 V; frequency range: 1 MHz to 10 mHz; AC amplitude: 10 mV; electrolyte: 6 M KOH.

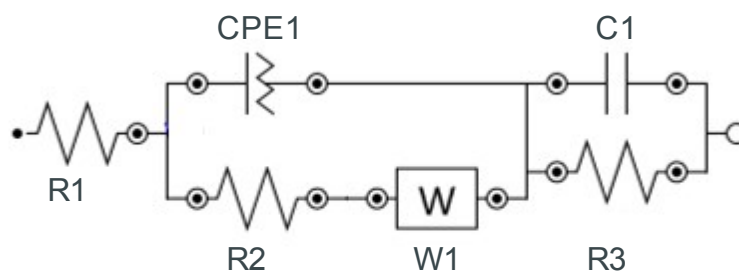

**Figure S2** Equivalent circuit used for fitting of EIS measurements.

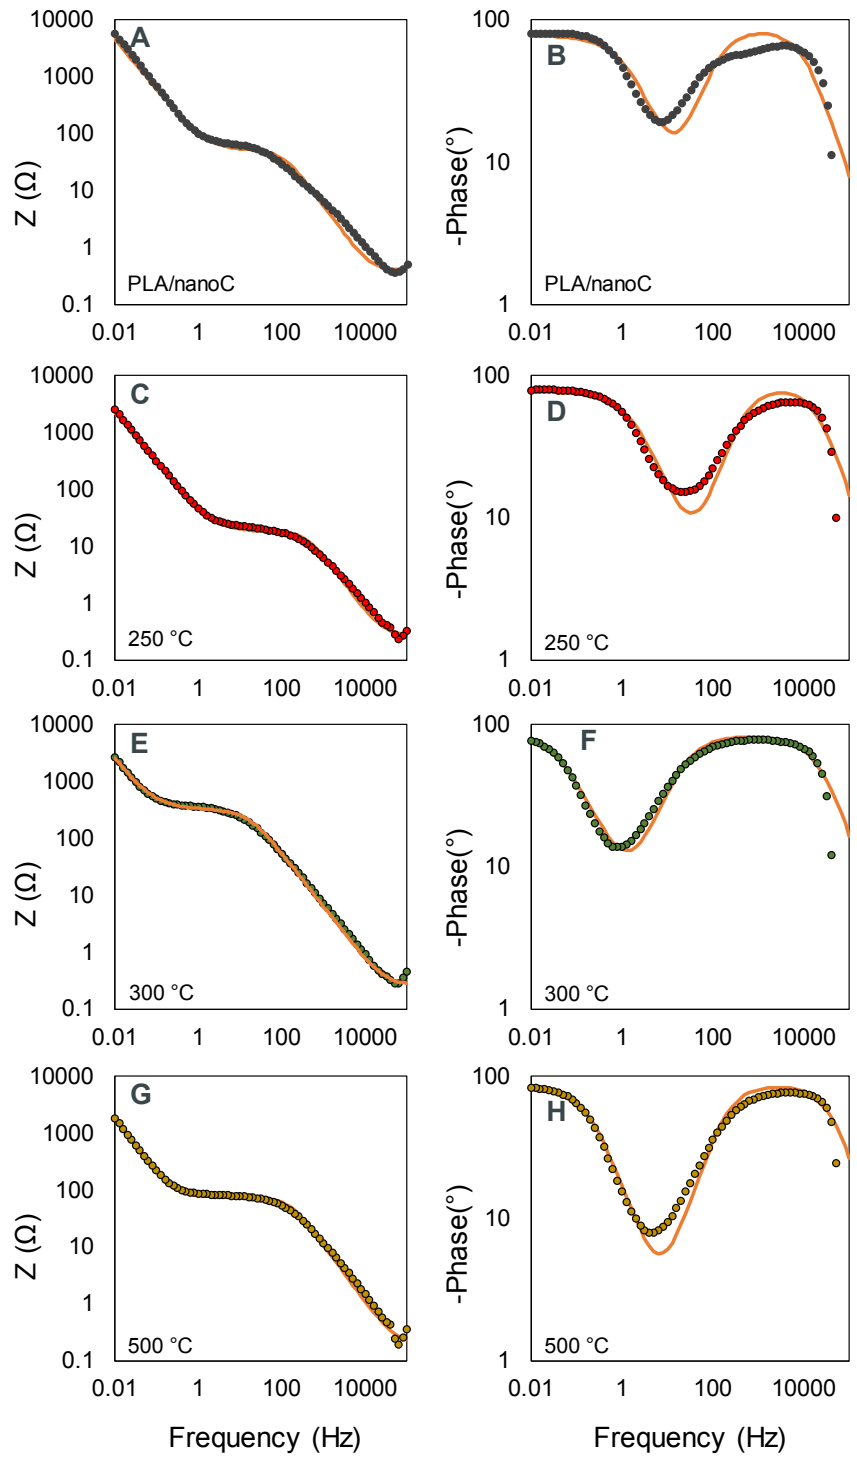

**Figure S3** Bode plots of the 3D printed electrodes as printed and after carbonisation at different temperatures.

**Table S1** Values of the parameters obtained after fitting the EIS of the tested electrodes.

| <b>Electrodes</b> | <b>R1 (<math>\Omega</math>)</b> | <b>f<sub>0</sub> (Hz)</b> | <b><math>\tau_0</math> (s)</b> |
|-------------------|---------------------------------|---------------------------|--------------------------------|
| <b>As-printed</b> | 0.395                           | 1.00                      | 1.0                            |
| <b>250 °C</b>     | 0.270                           | 1.26                      | 0.8                            |
| <b>300 °C</b>     | 0.264                           | 0.06                      | 15.8                           |
| <b>500 °C</b>     | 0.213                           | 0.25                      | 4.0                            |
